# Supplementary material for: Unanswered Questions Regarding Sex and BMP/TGF-β Signaling
Source: PubMed Central journal article supplement (PMC6027345; doi:10.3390/jdb6020014), 2018-06-16
Supplement: jdb-06-00014-s001.pdf [file jdb-06-00014-s001.pdf]

**Supplemental Table S1.** Chromosomal locations and genomic imprinting status for members of the BMP/TGF- $\beta$  signaling pathways.

| Protein        | HNGC ID | Chromo-some<br>(human/mouse) | Imprinted            | Protein                         | HNGC ID | Chromo-some<br>(human/mouse) | Imprinted                                           |
|----------------|---------|------------------------------|----------------------|---------------------------------|---------|------------------------------|-----------------------------------------------------|
| <b>Ligands</b> |         |                              |                      | <b>Extracellular Inhibitors</b> |         |                              |                                                     |
| AMH (MIS)      | 464     | 19/10                        | No                   | BAMBI                           | 30251   | 10/18                        | No                                                  |
| BMP2           | 1069    | 20/2                         | No                   | BMPER                           | 24154   | 7/9                          | No                                                  |
| BMP3           | 1070    | 4/5                          | No                   | Chordin                         | 1949    | 3/16                         | No                                                  |
| BMP3B (GDF10)  | 4215    | 10/14                        | No                   | DAND5 (Coco)                    | 26780   | 19/8                         | No                                                  |
| BMP4           | 1071    | 14/14                        | No                   | Decorin                         | 2705    | 12/10                        | Maternal for<br>mouse, not human<br>(verified [25]) |
| BMP5           | 1072    | 6/9                          | No                   | Follistatin                     | 3971    | 5/13                         | No                                                  |
| BMP6           | 1073    | 6/13                         | No                   | Gremlin                         | 2001    | 15/2                         | No                                                  |
| BMP7 (OP1)     | 1074    | 20/2                         | No                   | NBL1 (DAN)                      | 7650    | 1/4                          | No                                                  |
| BMP8A          | 21650   | 1/4                          | No                   | LTBP1                           | 6714    | 2/17                         | No                                                  |
| BMP8B (OP2)    | 1075    | 1/4                          | Predicted for humans | Noggin                          | 7866    | 17/11                        | No                                                  |
| BMP10          | 20869   | 2/6                          | No                   | Sclerostin                      | 13771   | 17/11                        | No                                                  |
| BMP15 (GDF9B)  | 1068    | X/X                          | No                   | Twisted Gastrulation            | 12429   | 18/17                        | No                                                  |
| GDF1           | 4214    | 19/8                         | No                   | <b>Receptors</b>                |         |                              |                                                     |
| GDF2 (BMP9)    | 4217    | 10/14                        | No                   | ACVR2B                          | 174     | 3/9                          | No                                                  |
| GDF3           | 4218    | 12/6                         | No                   | ACVRL1 (ALK1)                   | 175     | 12/15                        | No                                                  |
| GDF5 (BMP14)   | 4220    | 20/2                         | No                   | ACVR1 (ALK2)                    | 171     | 2/2                          | No                                                  |
| GDF6 (BMP13)   | 4221    | 8/4                          | No                   | ALK4 (ACVR1B)                   | 172     | 12/15                        | No                                                  |
| GDF9           | 4224    | 5/11                         | No                   | AMHR2                           | 465     | 12/15                        | No                                                  |

|                      |       |       |    |                                         |       |       |    |
|----------------------|-------|-------|----|-----------------------------------------|-------|-------|----|
| GDF11 (BMP11)        | 4216  | 12/10 | No | BMPR2                                   | 1078  | 2/1   | No |
| GDF15                | 30142 | 19/8  | No | BMPRIA (ALK3)                           | 1076  | 10/14 | No |
| INH $\alpha$         | 6065  | 2/1   | No | BMPRIB (ALK6)                           | 1077  | 4/3   | No |
| INH $\beta$ A (ACTA) | 6066  | 7/13  | No | TGF $\beta$ R2                          | 11773 | 3/9   | No |
| INH $\beta$ B (ACTB) | 6067  | 2/1   | No | TGF $\beta$ R3                          | 11774 | 1/5   | No |
| INH $\beta$ C (ACTC) | 6068  | 12/10 | No | <b>Intracellular Signal Transducers</b> |       |       |    |
| INH $\beta$ E (ACTE) | 24029 | 12/10 | No | SMAD1                                   | 6767  | 4/8   | No |
| LEFTYA               | 3122  | 1/1   | No | SMAD2                                   | 6768  | 18/18 | No |
| LEFTYB               | 6552  | 1/1   | No | SMAD3                                   | 6769  | 15/9  | No |
| MSTN (GDF8)          | 4223  | 2/1   | No | SMAD4                                   | 6770  | 18/18 | No |
| NODAL                | 7865  | 10/10 | No | SMAD5                                   | 6771  | 5/13  | No |
| TGF- $\beta$ 1       | 11766 | 19/7  | No | SMAD9(8)                                | 6774  | 13/3  | No |
| TGF- $\beta$ 2       | 11768 | 1/1   | No | <b>Intracellular Inhibitors</b>         |       |       |    |
| TGF- $\beta$ 3       | 11769 | 14/12 | No | SMAD6                                   | 6772  | 15/9  | No |
|                      |       |       |    | SMAD7                                   | 6773  | 18/18 | No |
|                      |       |       |    | SMURF1                                  | 16807 | 7/5   | No |
|                      |       |       |    | SMURF2                                  | 16809 | 17/11 | No |
